# Supplementary material
Source: PubMed Central journal article supplement (PMC6123273)
Supplement: NIHMS979011-supplement-Supp_figS1.pdf [file NIHMS979011-supplement-Supp_figS1.pdf]

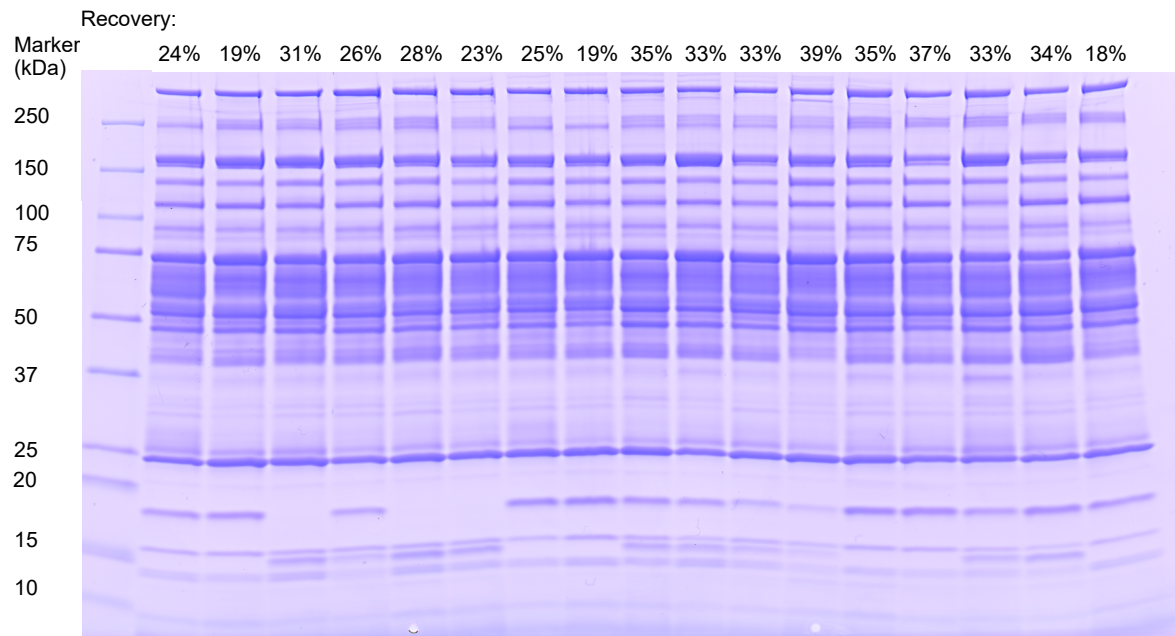

**Figure S1:** Coomassie Blue stain of SDS-PAGE-separated proteins from 17 randomly picked samples. After sample depletion, 10  $\mu$ g of protein was analyzed in each lane. The fraction of protein recovered after depletion is given as a percentage of the initial protein content above each lane.
