# Supplementary material
Source: PubMed Central journal article supplement (PMC6123273)

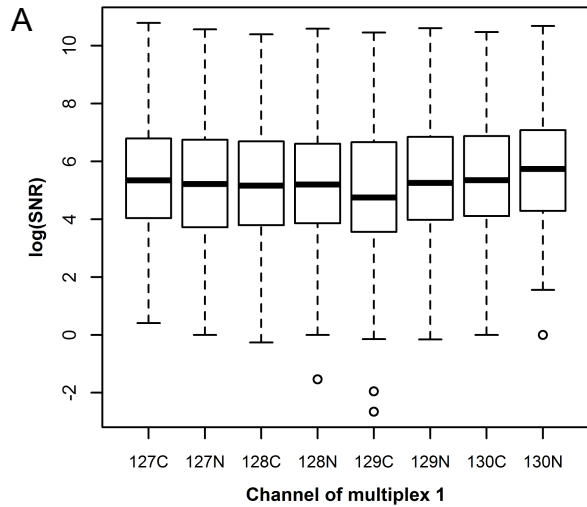

**Figure S2:** Boxplots of raw (A) and median normalized (B) relative protein estimates from each TMT label in experimental sample 1 replicate 1 (used for illustration). Heatmap of unsupervised clustering of Spearman's correlations of all samples. Tromsø Study visit number is indicated above the heatmap (1st visit in grey, 2nd visit in black). Shipment number is indicated to the left of the heatmap (1st shipment in green, 2nd shipment in red) (C). SNR = signal-to-noise ratio.

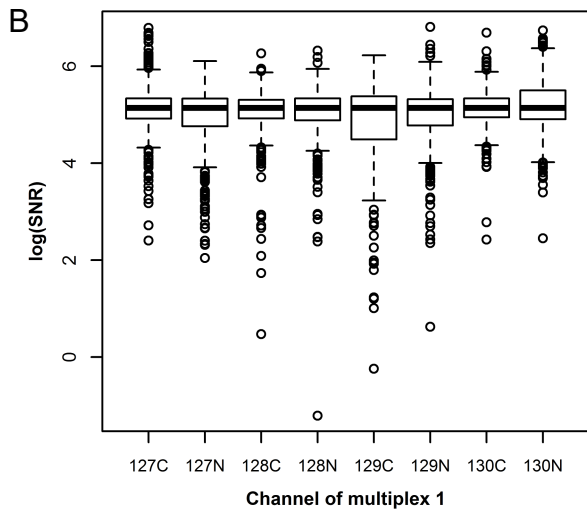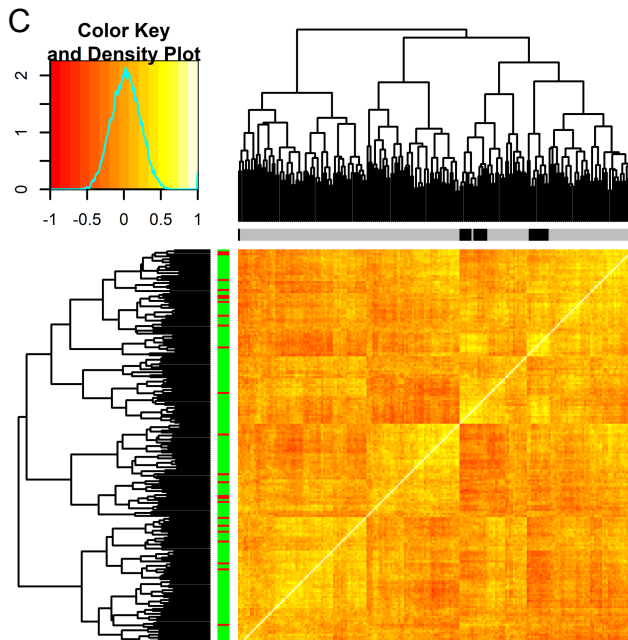

Supplement: NIHMS979011-supplement-Supp_figS2.pdf [file NIHMS979011-supplement-Supp_figS2.pdf]
