# Supplementary material
Source: PubMed Central journal article supplement (PMC6123273)
Supplement: NIHMS979011-supplement-Supp_figS3.pdf [file NIHMS979011-supplement-Supp_figS3.pdf]

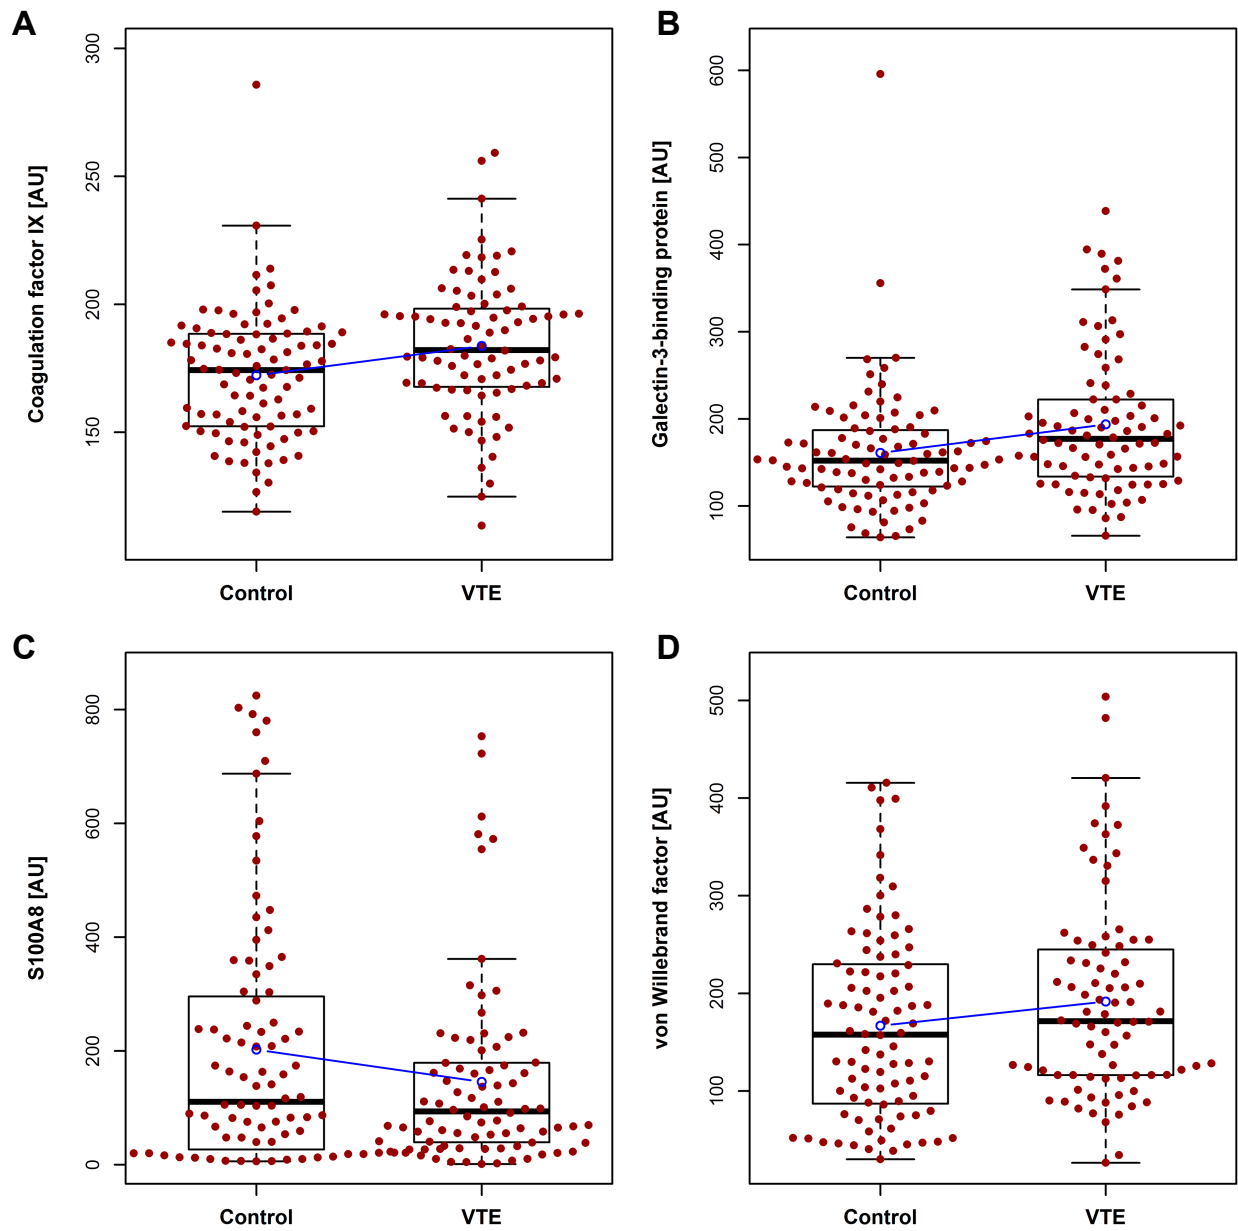

**Figure S3:** Boxplot of the relative plasma protein levels of coagulation factor IX (A), galectin-3-binding protein (B), S100A8 (C), and von Willebrand factor (D) in cases and controls. The regression line for VTE status is shown in blue. AU = arbitrary units.
