# Supplementary material
Source: PubMed Central journal article supplement (PMC6123273)
Supplement: NIHMS979011-supplement-Supp_figS4.pdf [file NIHMS979011-supplement-Supp_figS4.pdf]

MASHRLLLLCLAGLVFVSEAGPTGTGESKCP  
LMVKV><LDAVRGSPAINVAVHVFRKAADD  
WEPFASGKTSESGELHGLTTEEEFVEGIYKV  
EIDTKSYWKALGISPFHEHAEVVFTANDS  
GPRRYTIAALLSPYSYSTTAVVTNPKE

**Figure S4:** The proposed optimal cleavage sequence of DJ-1 [34]: VKV is highlighted in red in the primary sequence of transthyretin. The proposed cleavage site is indicated by ><.
